# Supplementary material
Source: publisher figshare collection journal article supplement (https://tandf.figshare.com/articles/dataset/_/5718268)
Supplement: Supplementary file 1 [file 2]

Archive with 2 entries (2 files):
- ATT Proofs, National JTPA Study.pdf
- UASA_A_1398657_Supplement.pdf
